# Supplementary material
Source: PubMed Central journal article supplement (PMC4267159)
Supplement: NIHMS639710-supplement-1.pdf [file NIHMS639710-supplement-1.pdf]

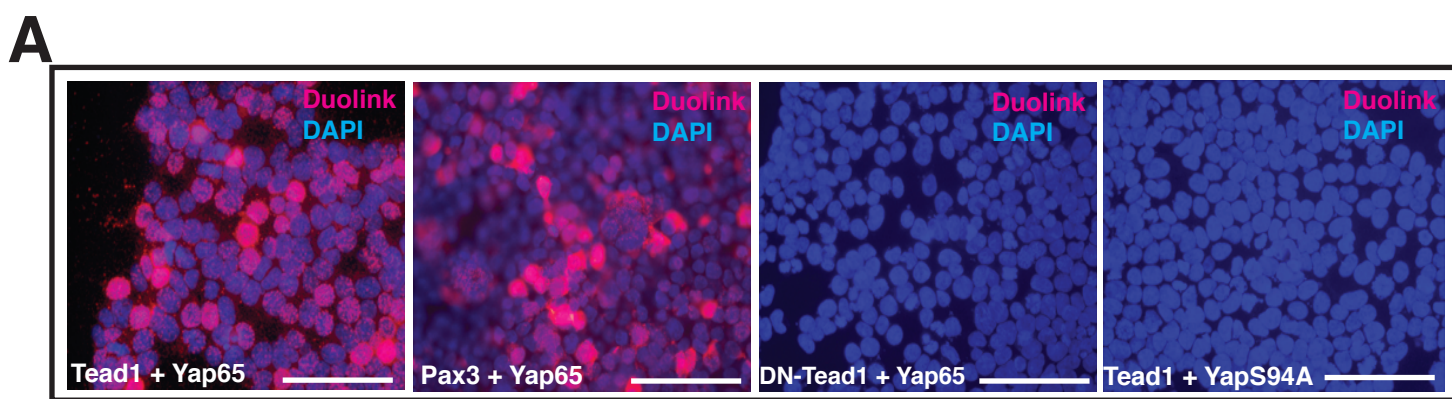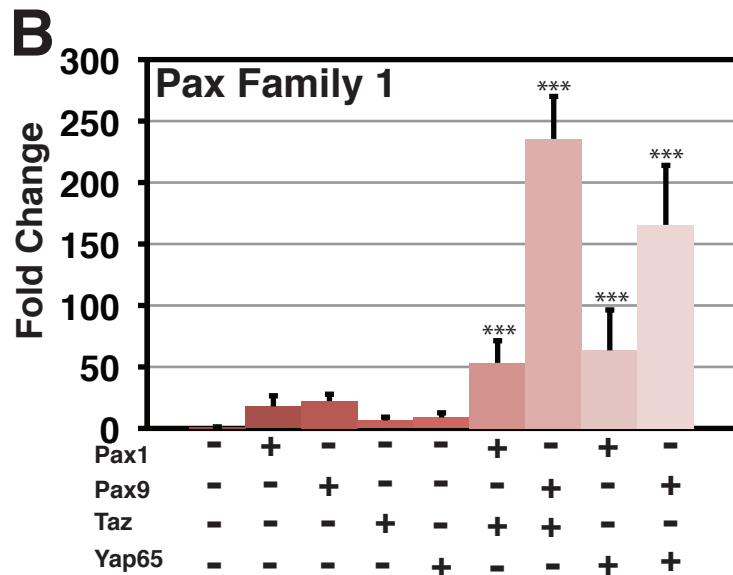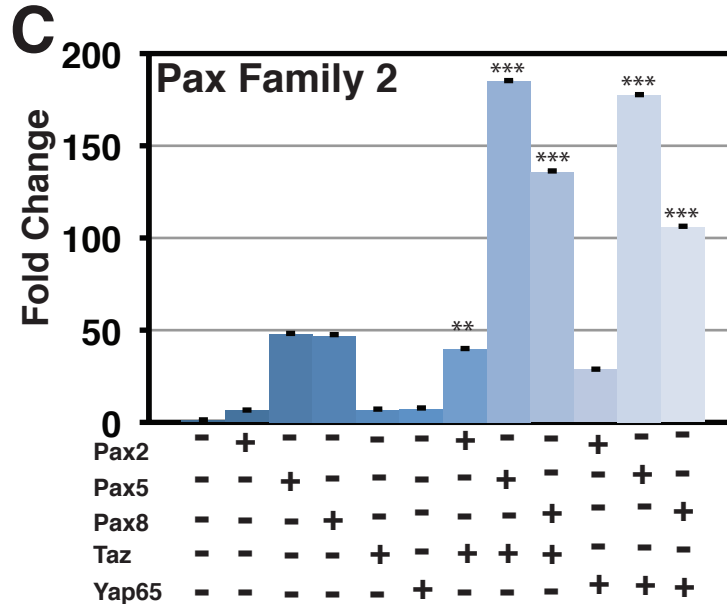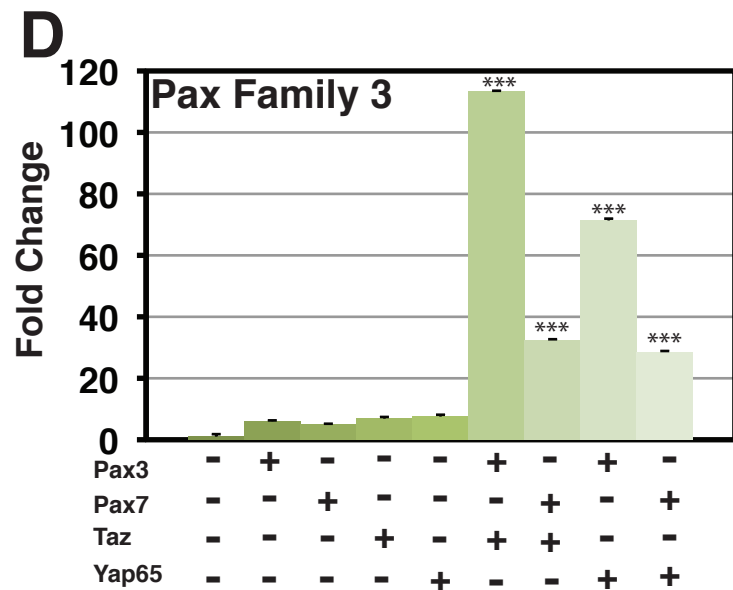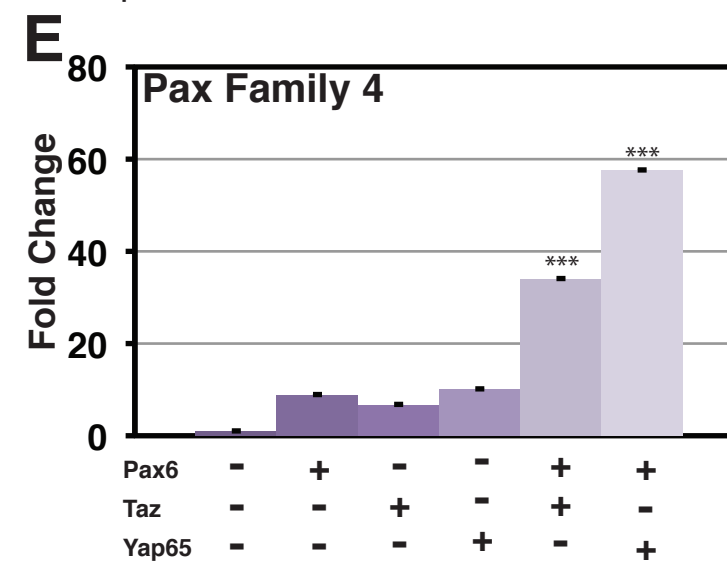

**Figure S1**

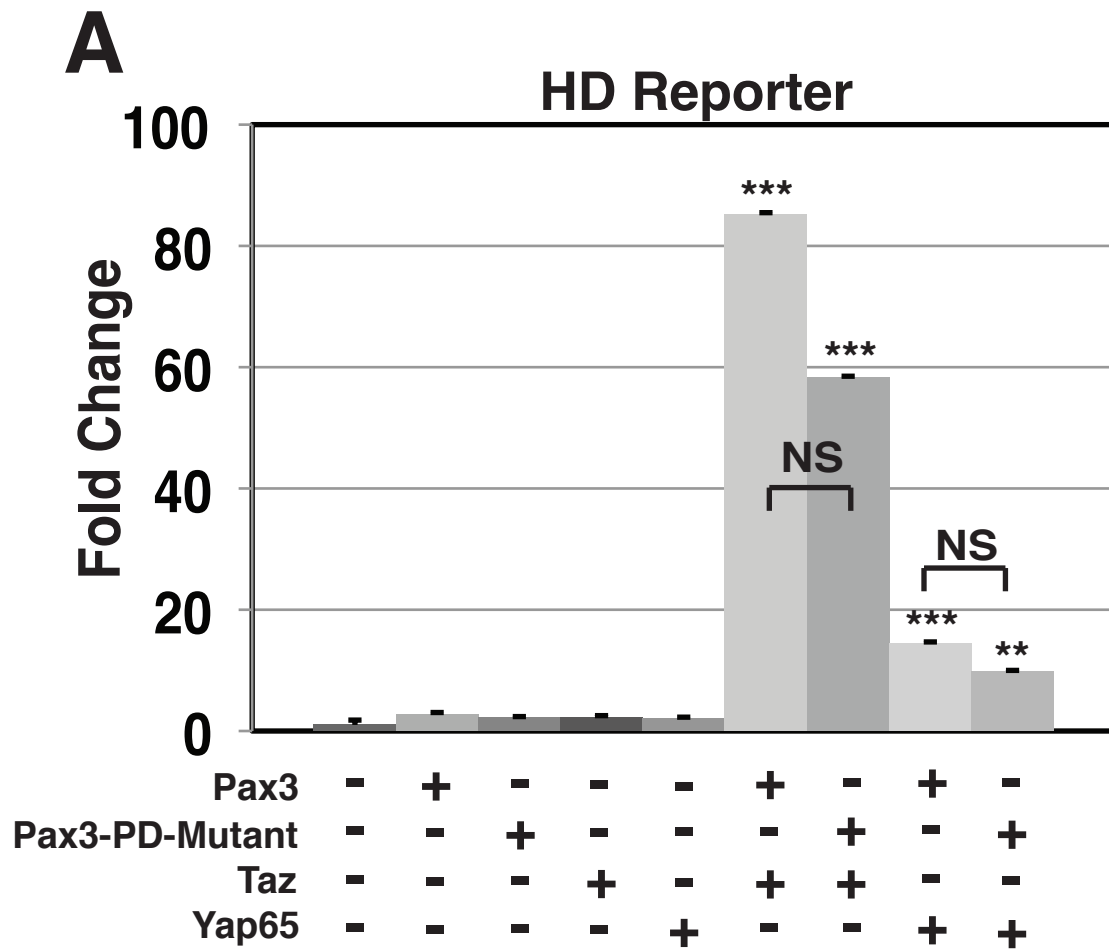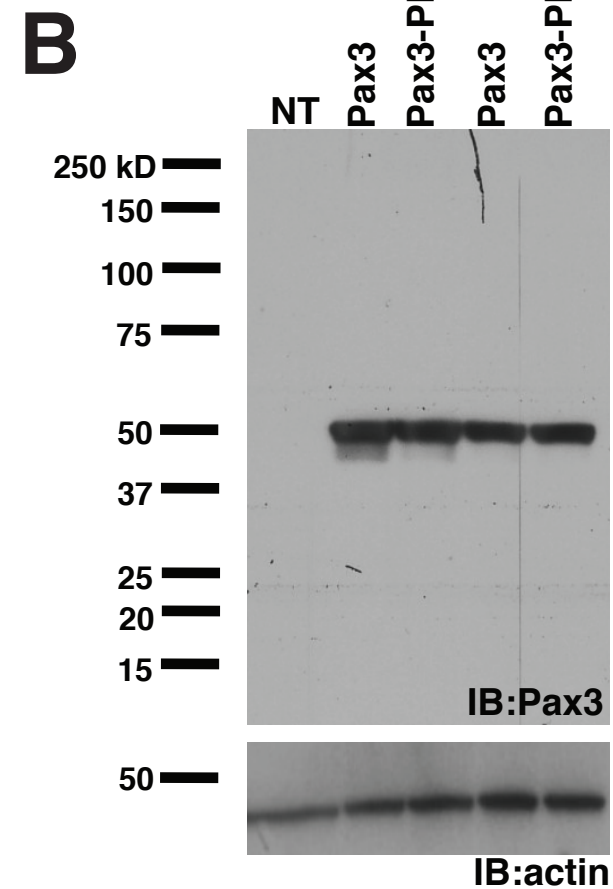

**Figure S2**

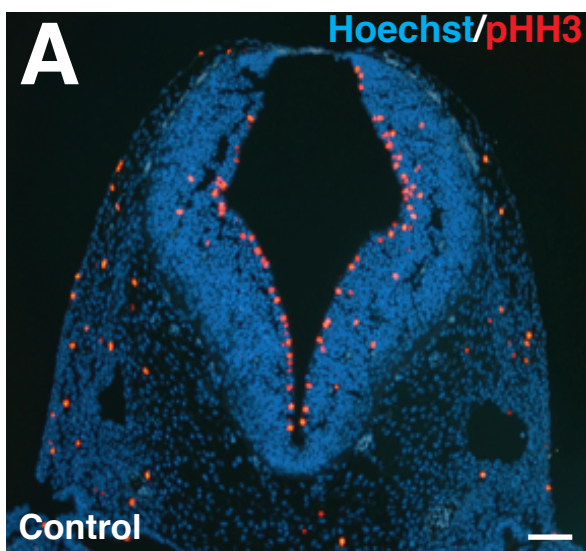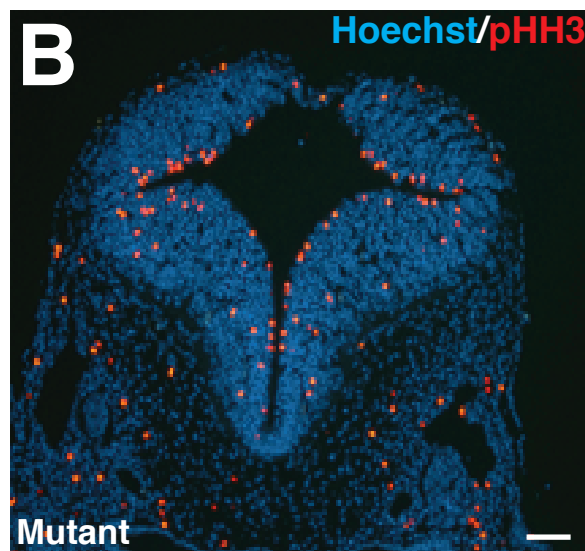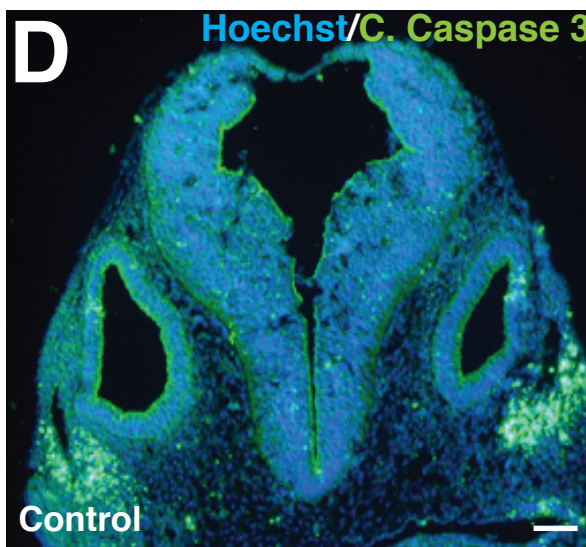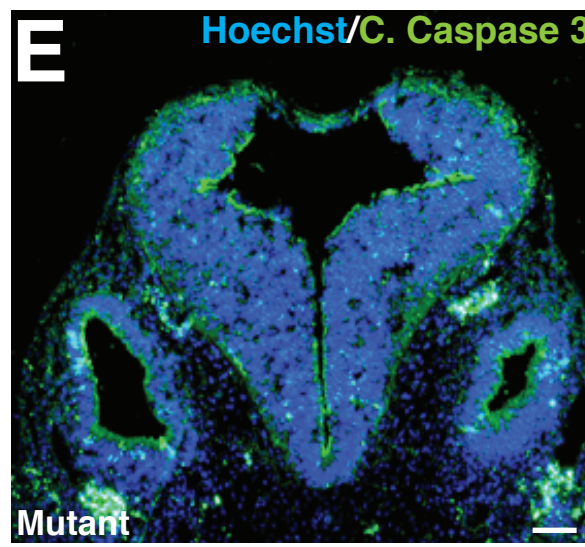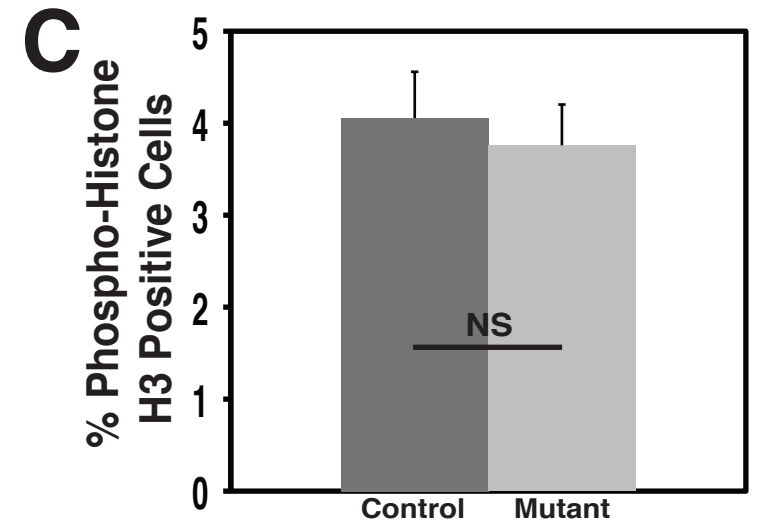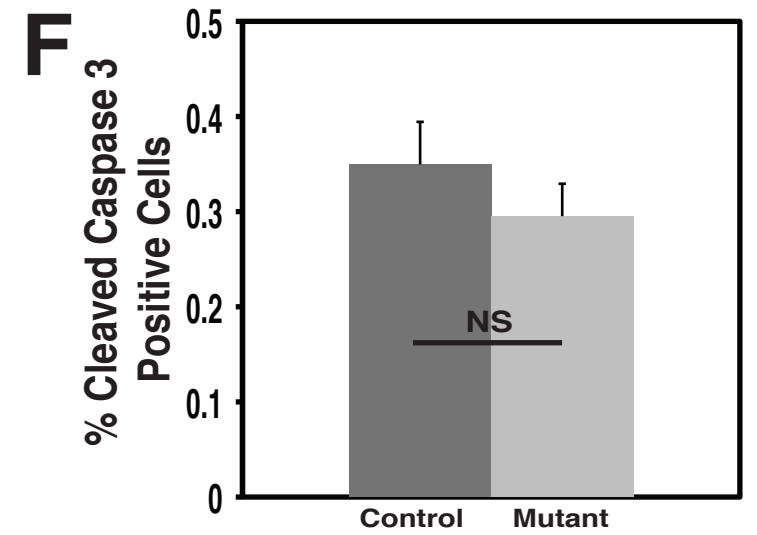

**Figure S3**

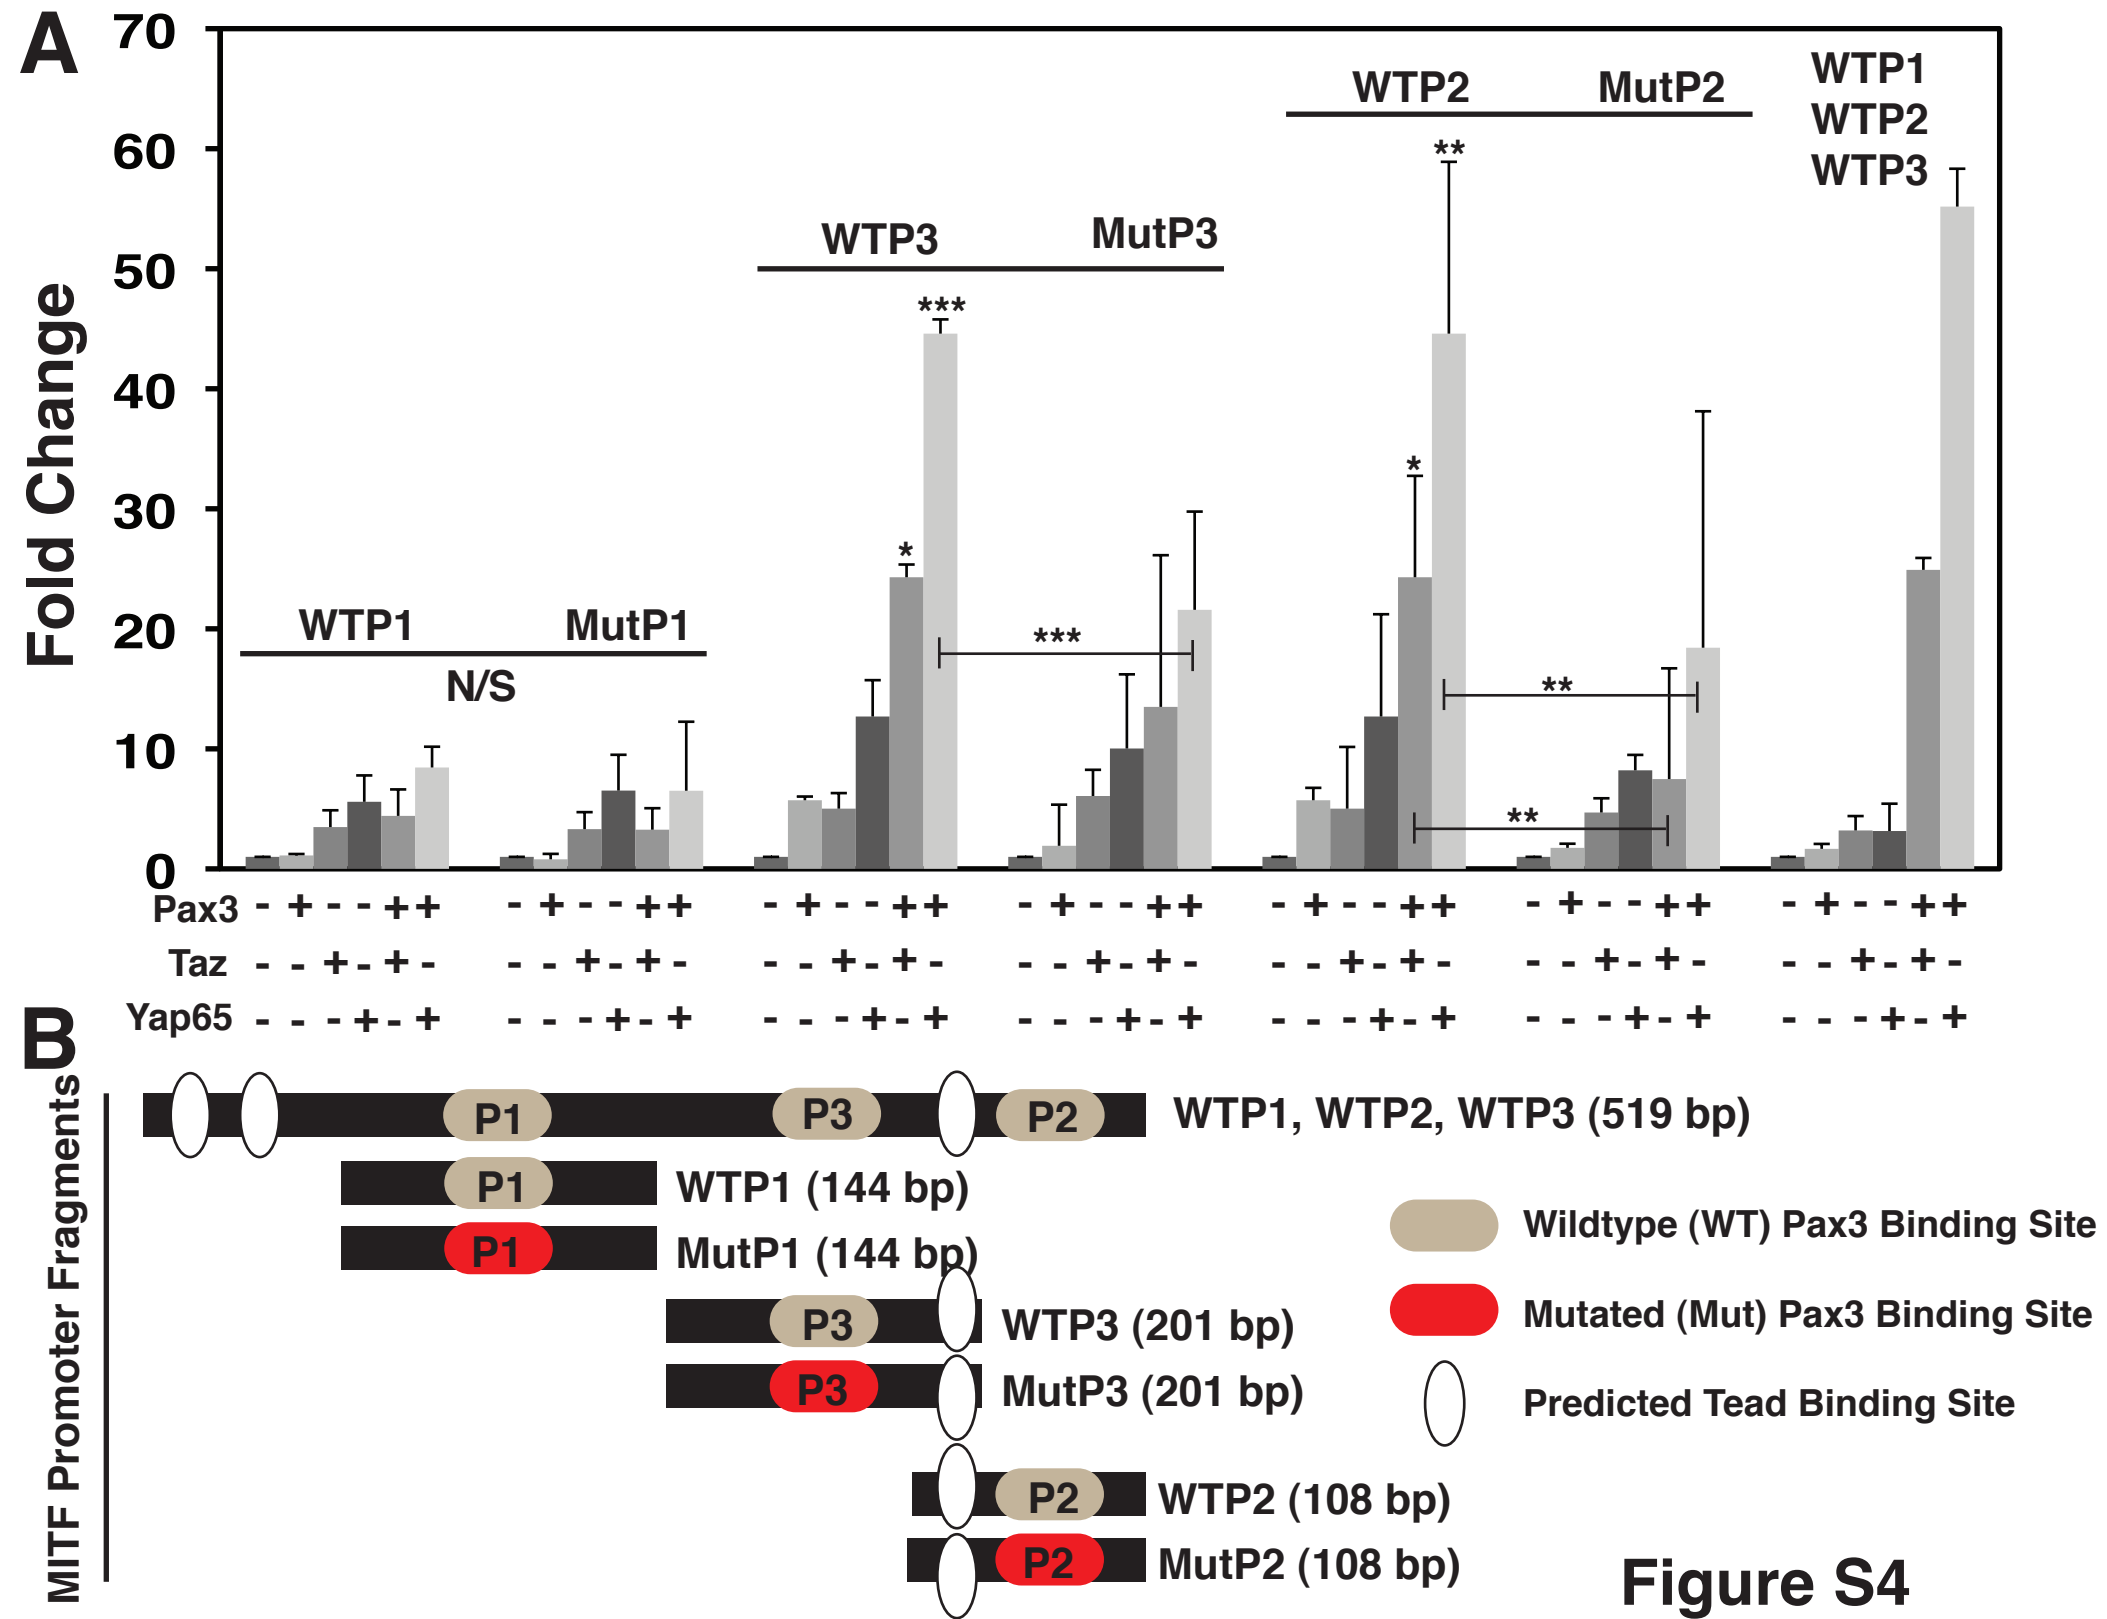

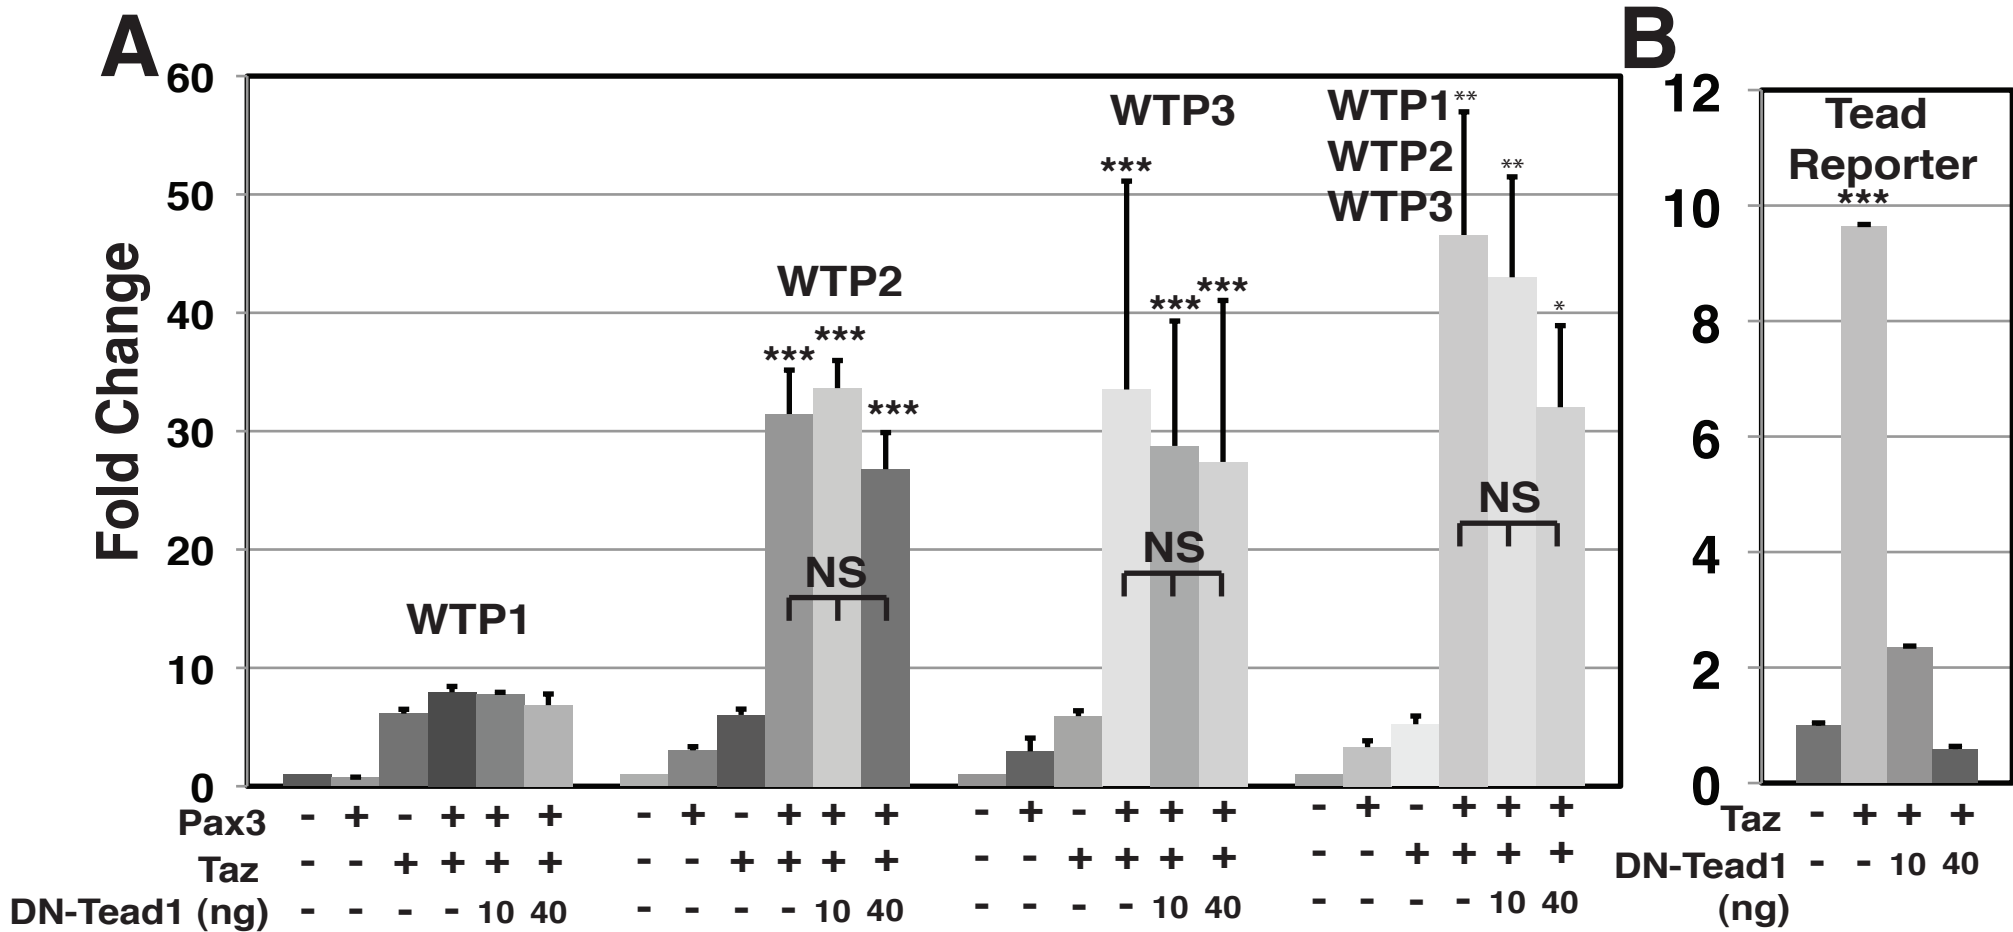

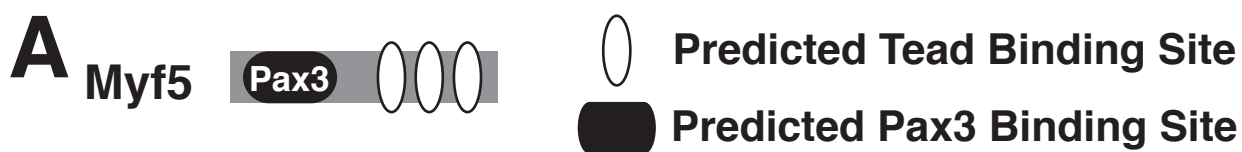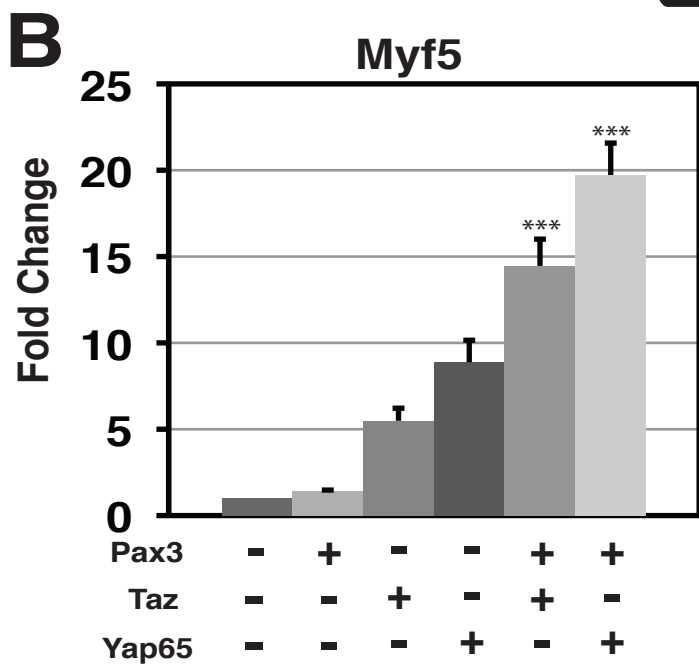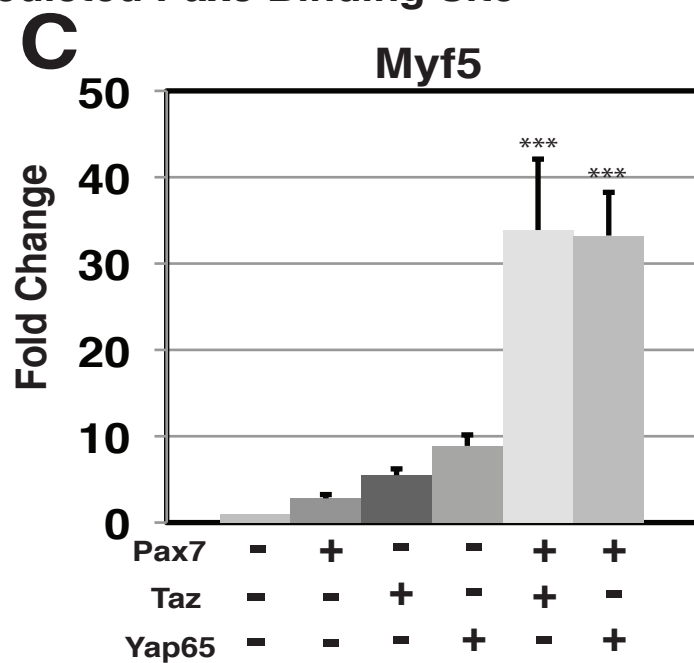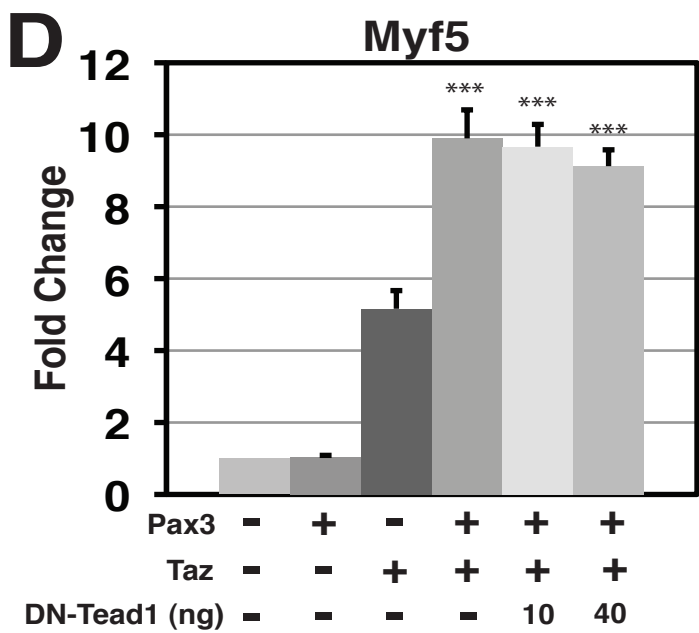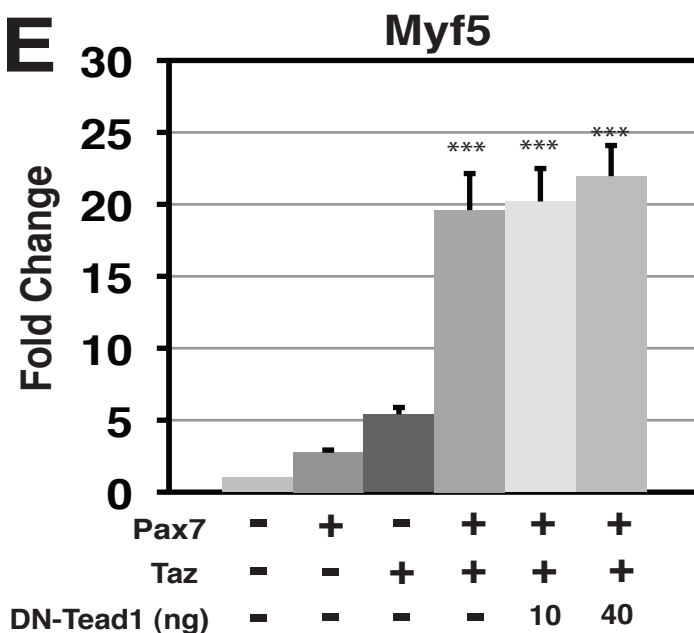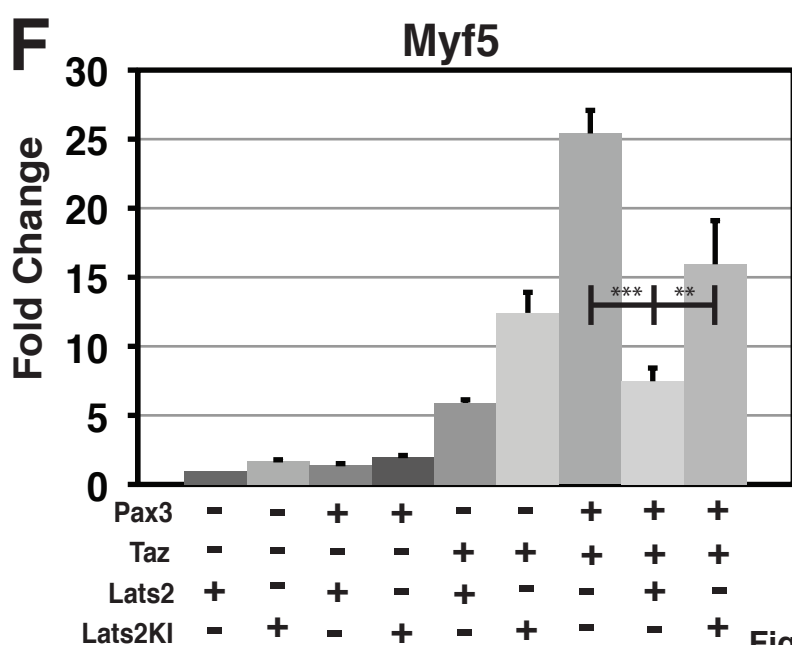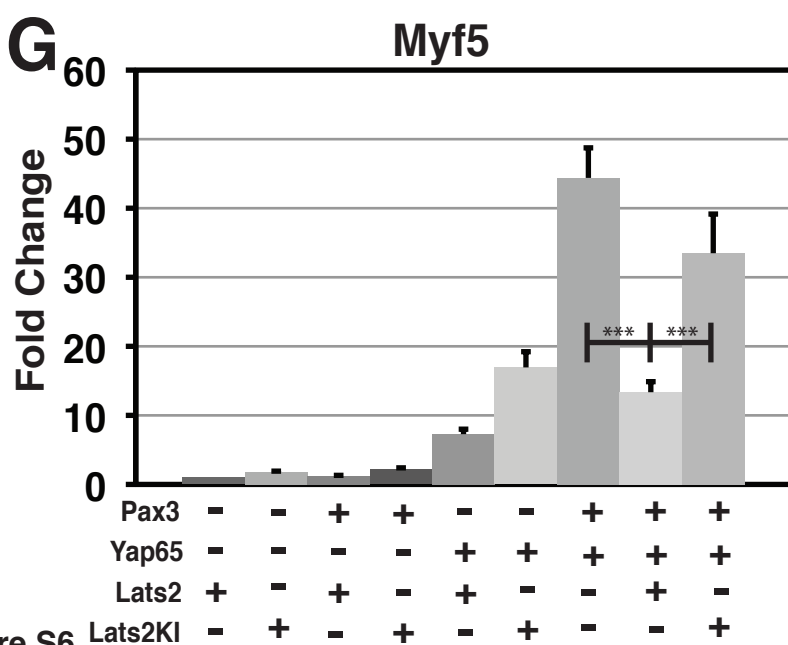

Figure S6

## Supplemental Figure Legends

**Figure S1 (Related to Figure 1). Pax3 and Yap65 can interact and the transcriptional activity of all Pax gene families are significantly increased in the presence of Taz or Yap65.** (A) Demonstration of Pax3-Yap65 interaction using Duolink® reagents. Interaction is documented as red fluorescence. Samples were co-transfected with the specified plasmids. Tead1+Yap65 served as the positive control. DN-Tead1 is truncated protein that retains DNA-binding capacity but cannot recruit Yap (Zhao et al., 2008). YapS94A is a point mutant shown previously to prevent interaction with Tead1 (Zhao et al., 2008). Scale bars: 100µm. (B) Results of dual luciferase reporter assays in HEK293T cells with Pax3-luciferase reporter in the presence (+) or absence (-) of Pax1, Pax9, Taz or Yap65. All activities were normalized to that observed in the absence of Pax1, Pax9, Taz or Yap65 (lane 1). (C) Results of dual luciferase reporter assays in HEK293T cells with Pax3-luciferase reporter in the presence (+) or absence (-) of Pax2, Pax5, Pax8, Taz or Yap65. All activities were normalized to that observed in the absence of Pax2, Pax5, Pax8, Taz or Yap65 (lane 1). (D) Results of dual luciferase reporter assays in HEK293T cells with Pax3-luciferase reporter in the presence (+) or absence (-) of Pax3, Pax7, Taz or Yap65. All activities were normalized to that observed in the absence of Pax3, Pax7, Taz or Yap65 (lane 1). (E) Results of dual luciferase reporter assays in HEK293T cells with Pax6-luciferase reporter in the presence (+) or absence (-) of Pax6, Taz or Yap65. All activities were normalized to that observed in the absence of Pax6, Taz or Yap65 (lane 1). In all experiments, luciferase activity was first normalized

to the activity of a co-transfected renilla luciferase construct. All experiments were performed in duplicate a minimum of three individual occasions. Data depicted are the mean + standard error of the mean (SEM). Statistics were completed using an ANOVA with a Tukey-Kramer post-hoc comparison test. \*\*\*  $p < 0.001$ , \*\* $p < 0.01$

**Figure S2 (Related to Figure 1). Pax3 Paired-Domain mutant can activate a Homeodomain reporter.** (A) Results of dual luciferase reporter assays in HEK293T cells with Pax3-HomeoDomain (HD)-Luciferase reporter in the presence (+) or absence (-) of Pax3, Pax3-Paired Domain (PD)-Mutant, Taz or Yap65. Data depicted are the mean + standard error of the mean (SEM). Statistics were completed using an ANOVA with a Tukey-Kramer post-hoc comparison test. \*\*\*  $p < 0.001$ , \*\* $p < 0.01$  (B) Anti-Pax3 western blot from HEK293T cells either non-transfected (NT), transfected with Pax3 or transfected the Pax3-Paired Domain (PD)-Mutant. Western blots of the same cellular protein lysates were also probed with anti-actin to demonstrate equivalent protein loading among samples.

**Figure S3 (Related to Figure 3). Taz/Yap65 neural crest null embryos display no alterations in proliferation or apoptosis.** (A) Cross section of a Wnt1-Cre; Taz<sup>flox/+</sup>;Yap<sup>flox/+</sup> E10.5 embryo (Control). (B) Cross section of a Wnt1-Cre; Taz<sup>flox/flox</sup>;Yap<sup>flox/flox</sup> E10.5 embryo (Mutant). A and B are both stained for phospho-Histone H3 (pHH3) as a marker of proliferation and Hoechst for a nuclear counterstain. (C) Quantitation of percent pHH3 positive cells in neural tubes from four control and five mutant embryos. (D) Cross section of a Wnt1-



Cre; Taz<sup>flox/+</sup>;Yap<sup>flox/+</sup> E10.5 embryo (Control). (E) Cross section of a Wnt1-Cre; Taz<sup>flox/flox</sup>;Yap<sup>flox/flox</sup> E10.5 embryo (Mutant). D and E are both stained for Cleaved Caspase 3 (C. Caspase 3) as a marker of apoptosis and Hoechst for a nuclear counterstain. (F) Quantitation of percent C. Caspase 3 positive cells in neural tubes from four control and three mutant embryos. Data depicted in panels C and F are the mean + standard error of the mean (SEM). Statistics were completed using a Student's t-test. NS=Not Significant, \*\*\*p<0.001. Panels A-B, D-E, scale bars: 100µm.

**Figure S4 (Related to Figure 5). Pax3 P2 and P3 binding sites within Mitf promoter fragments display Taz/Yap65 synergistic activation.** (A) Results of dual luciferase reporter assays in HEK293T cells with Mitf-promoter fragment luciferase reporters in the presence (+) or absence (-) of Pax3, Taz or Yap65. Fragments containing wildtype (WT) Pax3 binding sequences were compared to the same fragment differing only by the presence of a mutated (Mut) Pax3 binding sequences for each site (P1, P2 and P3). (B) Schematic representation of the Mitf-promoter fragment luciferase reporter plasmids. The Pax3 binding sites are denoted within oblong circles, labeled P1, P2 and P3, representing the consensus sequences AGTTCAGTAGTATTAATA, ATTAGCTTAGGTTAT, and AAGCATGACGTCAAGCCA, respectively. Mutated Pax3 binding sites are represented in the red oblong circles. Mutant P1 represents the sequence ACTTCGAGTAGTATCGCTA. Mutant P2 represents the sequence GCGAGCTTAGCTTCT. Mutant P3 represents the sequence AAACACGAGCTCGAGICA Underlined nucleotides indicate altered positions.

Predicted TEAD binding sites are denoted with white ovals, representing the consensus sequence XDGHATXT. The size of all fragments are included following the construct designation. In all experiments, luciferase activity was first normalized to the activity of a co-transfected renilla luciferase construct, then to the activity observed in the absence of specified cDNAs. All experiments were performed in duplicate a minimum of three individual occasions. Data depicted are the mean + standard error of the mean (SEM). Statistics were completed using an ANOVA with a Tukey-Kramer post-hoc comparison test. \*\*\*  $p < 0.001$ , \*\* $p < 0.01$ , \*  $p < 0.05$ , N/S=Not significant

**Figure S5 (Related to Figure 5). The Pax3-Taz/Yap65 co-activation of Mitf promoter fragments P2 and P3 is Tead independent.** (A) Results of dual luciferase reporter assays in HEK293T cells with Mitf-promoter fragment luciferase reporters in the presence (+) or absence (-) of Pax3, Taz or or the specified nanogram (ng) amount of DN-Tead1. In all experiments, luciferase activity was first normalized to the activity of a co-transfected renilla luciferase construct, then to the activity observed in the absence of specified cDNAs. All experiments were performed a minimum of three individual occasions. Data depicted are the mean + standard error of the mean (SEM). Statistics were completed using an ANOVA with a Tukey-Kramer post-hoc comparison test. \*\*\*  $p < 0.001$ , \*\* $p < 0.01$ , \*  $p < 0.05$ , N/S=Not significant

**Figure S6 (Related to Figure 6). The Pax3-Taz/Yap65 co-activation of endogenous Pax3 target gene Myf5 is Tead independent and can be inhibited by Lats2.** (A) Schematic representation of the Myf5 luciferase reporter

plasmid. The Pax3 binding site is denoted within the black oblong circles, representing the consensus sequence CGTCACGCTT. Predicted TEAD binding sites are denoted with white ovals, representing the consensus sequence XDGHATXT. (B) Results of dual luciferase reporter assays in HEK293T cells with Myf5-luciferase reporter in the presence (+) or absence (-) of Pax3, Taz or Yap65. (C) Results of dual luciferase reporter assays in HEK293T cells with Myf5-luciferase reporter in the presence (+) or absence (-) of Pax7, Taz or Yap65. (D) Results of dual luciferase reporter assays in HEK293T cells with Myf5-luciferase reporter in the presence (+) or absence (-) of Pax3, Taz or the specified nanogram (ng) amount of DN-Tead1. (E) Results of dual luciferase reporter assays in HEK293T cells with Myf5-luciferase reporter in the presence (+) or absence (-) of Pax7, Taz or the specified nanogram (ng) amount of DN-Tead1. (F) Results of dual luciferase reporter assays in HEK293T cells with Myf5-luciferase reporter in the presence (+) or absence (-) of Pax3, Taz, Lats2 or Lats2KI. (G) Results of dual luciferase reporter assays in HEK293T cells with Myf5-luciferase reporter in the presence (+) or absence (-) of Pax3, Yap65, Lats2 or Lats2KI. In all experiments, luciferase activity was first normalized to the activity of a co-transfected renilla luciferase construct, then to the activity observed in the absence of specified cDNAs (lane 1). All experiments were performed in duplicate a minimum of three individual occasions. Data depicted are the mean + standard error of the mean (SEM). Statistics were completed using an ANOVA with a Tukey-Kramer post-hoc comparison test. \*\*\*  $p < 0.001$ , \*\* $p < 0.01$

## Supplemental Tables

|   | Gene Symbols                                                 | Accession Numbers                                               | Fold Change |
|---|--------------------------------------------------------------|-----------------------------------------------------------------|-------------|
| 1 | <b>TAZ, WWTR1,</b><br>C78399,2310058J06RIK,2610021I22<br>RIK | AW907926,AW907926.1,AW909855,AW909855.1,BC004<br>640,BC004640.1 | 24.18429    |
| 2 | SDF5, SFRP2, A1851596                                        | BC014722,BC014722.1,BG246137,BG246137.1                         | 14.57312    |
| 3 | TBP                                                          | BC110341,BQ072304                                               | 10.74361    |
| 4 | ESX1, ESX1L, ESXR1                                           | BC042633,BI831835                                               | 6.21598     |
| 5 | <b>YAP, YAP1, YAP2, YAP65</b>                                | BC038235,BC038235.1,BM918433,BM918433.1                         | 3.872002    |

**Table S1. (Related to Figure 1) Pax3 High Throughput Screen Top Co-Activator Molecules**

## Supplemental Experimental Procedures

### Plasmids

To generate a Pax6 reporter construct, a previously identified Pax6 DNA-binding motif (Epstein et al., 1994a), TTTTTCACGCTTGAGTT, was synthetically generated and re-iterated six times. This sequence was then cloned upstream of pGL4.27 for use in luciferase assays (Promega). The *Myf5* reporter sequence, a 145-bp element located -57.5 kb upstream of *Myf5* (chr10:107,543,161-107,543,305 (mm10)), was subcloned into pGL4.27 (Promega, (Bajard et al., 2006)). Human *TEAD1* was provided by Kun-Liang Guan. The human *YAP-S94A* expression vector was described previously (Zhao et al, 2008, Addgene plasmid 33102). The murine *Pax1* expression construct was previously characterized (Brent et al., 2003, Addgene #13898) and was cloned into pCS3-6myc-DEST for expression. The murine *Pax2* expression construct was previously described (Lang et al., 2000 JCI). The human *PAX5* expression construct was a gift of M. Busslinger. The human *PAX6* expression construct was previously described (Epstein et al., 1994b) but was subcloned into pcDNA3 (Invitrogen). Murine *Pax8* was amplified from an expression library and cloned into pCMV-Sport6 (Invitrogen). The murine *Pax9* expression construct was previously described (Lang et al., 2000) and was subcloned into pcDNA3 (Invitrogen).

Human *MITF* promoter fragments were PCR-amplified from a human *MITF* reporter described previously (Lang et al., 2005). Pax3-binding site mutants were PCR-generated with primers containing the mutagenic nucleotides. The fragment primer sequences are as follows and genomic positions are referenced

using the UCSC Genome Browser on human Dec. 2013 (GRCh38/hg38)  
assembly:

**MITF Fragment containing Pax3 P1, P3, and P2 binding sites (519 bp)**

chr3:69936067-69936585

Forward: GAATTCAAGCTTAGGTCAATAGGCAGGTTACAC

Reverse: GTGTCTAAGCTTTTTATCACAG

**MITF Fragment Pax3 P1 (144 bp)**

chr3:69,936,263-69,936,406

Forward: GAATTCAAGCTTTGATGTCTCCTCCAAAGGGG

Reverse: GAATTCAAGCTTAAGTGACGAGCTATCAAAGTCAAAC

**MITF Fragment Pax3 P2 (108 bp)**

chr3:69,936,478-69,936,585

Forward: GAATTCAAGCTTAAGACCAAACCTCGTAGGGC

Reverse: GAATTCAAGCTTTTTATCACAGAAGCCCTGC

**MITF Fragment Pax3 P3 (201 bp)**

chr3:69,936,346-69,936,546

Forward: GAATTCAAGCTTAAGATGAATAGTGAATTGGCCTTG

Reverse: GAATTCAAGCTTTAGTTATGCATGTAAAAAAAAACGTTTAC

Mutations in the respective Pax3 P1, P2 or P3 binding sites were introduced by  
recombinant circle PCR using pairs of reactions (Reaction 1 and Reaction 2)

using the following primers:

**MITF Fragment Mutated Pax3 P1 BS**

Reaction 1

Forward: CTTTACTTCGAGTAGTATCGCTAGACAATGGTATTTCTC

Reverse: ATGAATAGTGAATTGGCCTTGATC

Reaction 2

Forward: TTTCTCTTTCAGCAATAGGTTAATAG

Reverse: TACCATTGTCTAGCGATACTACTCGAAGTAAAGATG

**MITF Fragment Mutated Pax3 P2 BS**

Reaction 1

Forward: TGCATAACTAGCGAGCTTAGCTTCTTATAAGCAGGGCTTCTGTG

Reverse: TGTAACAAAAACGTTTACATAAGGGCC

Reaction 2

Forward: TGTGATAAAAAGCTTATCGATACCGTCGACCTCG

Reverse:

GAAGCCCTGCTTATAAGAAGCTAAGCTCGCTAGTTATGCATG

### **MITF Fragment Mutated Pax3 P3 BS**

Reaction 1

Forward: ATGAAAAAAAAACACGAGCTCGAGTCAGGGGGAAAAA

Reverse: AAATATAAAGAACCTTTTTAAGTGACGAGCTATC

Reaction 2

Forward: TTGATATCAACATTTAAGACCAAACCTCGTAGGGCTTCC

Reverse: TTTTCCCCCTGACTCGAGCTCGTGTTTTTTTTTCAT

All *MITF* promoter fragments were sequence verified to exclude polymerase errors after insertion into the pGL4.27 vector for use in luciferase assays.

### **Histology and immunohistochemistry**

Samples were harvested, fixed overnight in 4% paraformaldehyde and dehydrated through an ethanol series. All samples were paraffin embedded and sectioned. The antibody used for phospho-histone H3 (pHH3) immunofluorescence was anti-pHH3 (Ser 10, 6G3) mouse monoclonal (9706L, Cell Signaling). The antibody used for Cleaved Caspase 3 (C. Caspase 3) immunofluorescence was anti-Caspase 3 (Cleaved) rabbit polyclonal (CP229A, Biocare). Nuclei were stained blue with Hoechst dye. Quantitation of neural tube cell numbers was performed on Hoechst-stained sections using ImageJ software (National Institutes of Health, Bethesda, MD).

### **Proximity Ligation Assay**

The proximity ligation assay was performed on transfected HEK293T cells. All transfections were completed using FuGene6 (Roche). Experiments utilized 40ng of each specified plasmid. Primary antibodies were incubated for 1 hour at room temperature and included anti-Pax3 mouse monoclonal (developed by C.P. Ordahl and obtained from the Developmental Studies Hybridoma Bank, created

by the NICHD of the NIH), anti-Yap rabbit polyclonal (Cell Signaling #4912S) and anti-myc mouse monoclonal (Cell Signaling #2276) as Tead1 and DN-Tead1 contain an N-terminal myc epitope tag. Staining was performed using the Duolink® In Situ Detection Reagents- Red kit (Sigma-Aldrich) following manufacturer's instructions. The DAPI nuclear stain was included in the Duolink® mounting media (Sigma-Aldrich).

### **Western Blot**

Anti-Pax3 membranes were probed with primary antibody overnight (Pax3 mouse monoclonal antibody, developed by C.P. Ordahl and obtained from the Developmental Studies Hybridoma Bank, created by the NICHD of the NIH).

### **Supplemental References**

Bajard, L., Relaix, F., Lagha, M., Rocancourt, D., Daubas, P., and Buckingham, M.E. (2006). A novel genetic hierarchy functions during hypaxial myogenesis: Pax3 directly activates Myf5 in muscle progenitor cells in the limb. *Genes Dev* 20, 2450-2464.

Brent, A.E., Schweitzer, R. and Tabin, C.J. (2003). A somitic compartment of tendon progenitors. *Cell* 113, 235-248.

Epstein, J., Cai, J., Glaser, T., Jepeal, L., and Maas, R. (1994a). Identification of a Pax paired domain recognition sequence and evidence for DNA-dependent conformational changes. *J Biol Chem* 269, 8355-8361.

Epstein, J. A., Glaser, T., Cai, J., Jepeal, L., Walton, D. S. and Maas, R. L. (1994b). Two independent and interactive DNA-binding subdomains of the Pax6 paired domain are regulated by alternative splicing. *Genes Dev* 8, 2022-2034.

Lang, D., Chen, F., Milewski, R., Li, J., Lu, M.M., and Epstein, J.A. (2000). Pax3 is required for enteric ganglia formation and functions with Sox10 to modulate expression of c-ret. *J Clin Invest* 106, 963-971.

Lang, D., Lu, M.M., Huang, L., Engleka, K.A., Zhang, M., Chu, E.Y., Lipner, S., Skoultchi, A., Millar, S.E., and Epstein, J.A. (2005). Pax3 functions at a nodal point in melanocyte stem cell differentiation. *Nature* 433, 884-887.



Zhao, B., Ye, X., Yu, J., Li, L., Li, W., Li, S., Lin, J.D., Wang, C.Y., Chinnaiyan, A.M., Lai, Z.C., *et al.* (2008). TEAD mediates YAP-dependent gene induction and growth control. *Genes Dev* 22, 1962-1971.
